# Supplementary material for: Brassinosteroids affect wood development and properties of Fraxinus mandshurica
Source: Front Plant Sci. 2023 Jul 17;14:1167548. doi: 10.3389/fpls.2023.1167548 (PMC10400452; doi:10.3389/fpls.2023.1167548)
Supplement: Supplementary file 5 [file Table_4.xlsx]

## Sheet: A
GO analysis for up and down regulated Xylem-Specifically Expressed Genes (X-SEGs) of F. mandshurica (M8)
Ontoloty	GO term	GO ID (level1)	GO ID (level2)	Number of Genes	Pvalue	Qvalue
Biological Process	multi-organism process	GO:0008150	GO:0051704	46	2.56588e-12	7.75921e-10
Biological Process	single-organism process	GO:0008150	GO:0044699	653	5.80343e-06	0.000274212
Biological Process	immune system process	GO:0008150	GO:0002376	15	1.31587e-05	0.000462696
Biological Process	reproduction	GO:0008150	GO:0000003	37	0.00283661	0.033854
Biological Process	reproductive process	GO:0008150	GO:0022414	37	0.00283661	0.033854
Biological Process	metabolic process	GO:0008150	GO:0008152	760	0.00371069	0.0412542
Biological Process	locomotion	GO:0008150	GO:0040011	3	0.0413389	0.265976
Biological Process	response to stimulus	GO:0008150	GO:0050896	160	0.0583023	0.331403
Biological Process	multicellular organismal process	GO:0008150	GO:0032501	47	0.0596208	0.334093
Biological Process	rhythmic process	GO:0008150	GO:0048511	5	0.104545	0.4834
Biological Process	signaling	GO:0008150	GO:0023052	58	0.123229	0.551251
Biological Process	positive regulation of biological process	GO:0008150	GO:0048518	28	0.329961	0.864181
Biological Process	biological regulation	GO:0008150	GO:0065007	227	0.366613	0.889202
Biological Process	regulation of biological process	GO:0008150	GO:0050789	203	0.563978	0.994858
Biological Process	detoxification	GO:0008150	GO:0098754	1	0.736401	1
Biological Process	growth	GO:0008150	GO:0040007	3	0.812665	1
Biological Process	developmental process	GO:0008150	GO:0032502	35	0.846832	1
Biological Process	cellular process	GO:0008150	GO:0009987	802	0.975239	1
Biological Process	localization	GO:0008150	GO:0051179	130	0.998615	1
Biological Process	cellular component organization or biogenesis	GO:0008150	GO:0071840	114	0.999978	1
Biological Process	negative regulation of biological process	GO:0008150	GO:0048519	10	0.999994	1
Molecular Function	catalytic activity	GO:0003674	GO:0003824	1391	5.45758e-05	0.00444755
Molecular Function	transporter activity	GO:0003674	GO:0005215	189	0.00199091	0.0450798
Molecular Function	nucleic acid binding transcription factor activity	GO:0003674	GO:0001071	113	0.0046416	0.0761062
Molecular Function	antioxidant activity	GO:0003674	GO:0016209	30	0.0427684	0.272972
Molecular Function	molecular transducer activity	GO:0003674	GO:0060089	18	0.0753816	0.344653
Molecular Function	signal transducer activity	GO:0003674	GO:0004871	19	0.272589	0.61722
Molecular Function	nutrient reservoir activity	GO:0003674	GO:0045735	6	0.314349	0.679423
Molecular Function	electron carrier activity	GO:0003674	GO:0009055	27	0.367724	0.737775
Molecular Function	transcription factor activity, protein binding	GO:0003674	GO:0000988	7	0.845521	1
Molecular Function	binding	GO:0003674	GO:0005488	1224	0.999962	1
Molecular Function	molecular function regulator	GO:0003674	GO:0098772	18	0.999962	1
Molecular Function	structural molecule activity	GO:0003674	GO:0005198	35	1	1
Cellular Component	membrane	GO:0005575	GO:0016020	1047	4.83095e-16	8.38516e-15
Cellular Component	membrane part	GO:0005575	GO:0044425	1006	1.40656e-15	2.27862e-14
Cellular Component	extracellular region	GO:0005575	GO:0005576	66	0.0116411	0.0831997
Cellular Component	extracellular matrix	GO:0005575	GO:0031012	2	0.480184	1
Cellular Component	cell junction	GO:0005575	GO:0030054	6	0.55352	1
Cellular Component	symplast	GO:0005575	GO:0055044	6	0.55352	1
Cellular Component	extracellular region part	GO:0005575	GO:0044421	2	0.852239	1
Cellular Component	supramolecular fiber	GO:0005575	GO:0099512	10	0.877224	1
Cellular Component	virion	GO:0005575	GO:0019012	1	0.999927	1
Cellular Component	virion part	GO:0005575	GO:0044423	1	0.999927	1
Cellular Component	membrane-enclosed lumen	GO:0005575	GO:0031974	11	1	1
Cellular Component	cell part	GO:0005575	GO:0044464	668	1	1
Cellular Component	cell	GO:0005575	GO:0005623	698	1	1
Cellular Component	organelle	GO:0005575	GO:0043226	512	1	1
Cellular Component	macromolecular complex	GO:0005575	GO:0032991	165	1	1
Cellular Component	organelle part	GO:0005575	GO:0044422	140	1	1

## Sheet: B
KEGG analysis for up regulated Xylem-Specifically Expressed Genes (X-SEGs) of F. mandshurica (M8)
Pathway	KEGG_A_class	KEGG_B_class	Pathway ID	X (1499)	All (15369)	Rich factor	Pvalue	Qvalue
Photosynthesis	Metabolism	Energy metabolism	ko00195	66	154	0.429	3.12346e-27	4.09173e-25
Photosynthesis - antenna proteins	Metabolism	Energy metabolism	ko00196	27	35	0.771	4.4602e-21	2.92143e-19
Biosynthesis of secondary metabolites	Metabolism	Global and overview maps	ko01110	469	3374	0.139	5.68288e-19	2.48153e-17
Metabolic pathways	Metabolism	Global and overview maps	ko01100	767	6400	0.12	3.22516e-15	1.05624e-13
Porphyrin and chlorophyll metabolism	Metabolism	Metabolism of cofactors and vitamins	ko00860	36	130	0.277	4.72936e-09	1.23909e-07
Carbon fixation in photosynthetic organisms	Metabolism	Energy metabolism	ko00710	40	179	0.223	4.3327e-07	9.45973e-06
Phenylpropanoid biosynthesis	Metabolism	Biosynthesis of other secondary metabolites	ko00940	75	456	0.164	4.05807e-06	7.59439e-05
Carotenoid biosynthesis	Metabolism	Metabolism of terpenoids and polyketides	ko00906	29	125	0.232	7.47667e-06	0.000122431
Flavonoid biosynthesis	Metabolism	Biosynthesis of other secondary metabolites	ko00941	29	133	0.218	2.63459e-05	0.00038348
Cyanoamino acid metabolism	Metabolism	Metabolism of other amino acids	ko00460	38	205	0.185	7.80156e-05	0.00102201
Anthocyanin biosynthesis	Metabolism	Biosynthesis of other secondary metabolites	ko00942	6	11	0.545	0.000255581	0.00304373
Glyoxylate and dicarboxylate metabolism	Metabolism	Carbohydrate metabolism	ko00630	33	194	0.17	0.00108761	0.0118731
Diterpenoid biosynthesis	Metabolism	Metabolism of terpenoids and polyketides	ko00904	18	93	0.194	0.00347631	0.0350305
Circadian rhythm - plant	Organismal Systems	Environmental adaptation	ko04712	38	257	0.148	0.00615953	0.0524767
ABC transporters	Environmental Information Processing	Membrane transport	ko02010	34	224	0.152	0.00619122	0.0524767
Galactose metabolism	Metabolism	Carbohydrate metabolism	ko00052	38	258	0.147	0.00656414	0.0524767
Plant-pathogen interaction	Organismal Systems	Environmental adaptation	ko04626	124	1028	0.121	0.00680995	0.0524767
Glycosphingolipid biosynthesis - globo and isoglobo series	Metabolism	Glycan biosynthesis and metabolism	ko00603	7	26	0.269	0.0103417	0.0752645
Carbon metabolism	Metabolism	Global and overview maps	ko01200	81	647	0.125	0.0110589	0.0762481
Ubiquinone and other terpenoid-quinone biosynthesis	Metabolism	Metabolism of cofactors and vitamins	ko00130	16	91	0.176	0.0142556	0.0894815
Terpenoid backbone biosynthesis	Metabolism	Metabolism of terpenoids and polyketides	ko00900	22	138	0.159	0.0143444	0.0894815
Riboflavin metabolism	Metabolism	Metabolism of cofactors and vitamins	ko00740	12	63	0.19	0.0174225	0.103743
Plant hormone signal transduction	Environmental Information Processing	Signal transduction	ko04075	116	991	0.117	0.020355	0.114257
Sesquiterpenoid and triterpenoid biosynthesis	Metabolism	Metabolism of terpenoids and polyketides	ko00909	16	95	0.168	0.0209326	0.114257
Zeatin biosynthesis	Metabolism	Metabolism of terpenoids and polyketides	ko00908	15	89	0.169	0.0246861	0.129355
Stilbenoid, diarylheptanoid and gingerol biosynthesis	Metabolism	Biosynthesis of other secondary metabolites	ko00945	11	60	0.183	0.0289136	0.144357
Nicotinate and nicotinamide metabolism	Metabolism	Metabolism of cofactors and vitamins	ko00760	16	99	0.162	0.0297529	0.144357
Arachidonic acid metabolism	Metabolism	Lipid metabolism	ko00590	13	78	0.167	0.0378255	0.176969
Betalain biosynthesis	Metabolism	Biosynthesis of other secondary metabolites	ko00965	9	48	0.188	0.0401994	0.180861
Alanine, aspartate and glutamate metabolism	Metabolism	Amino acid metabolism	ko00250	15	95	0.158	0.0414185	0.180861
Cysteine and methionine metabolism	Metabolism	Amino acid metabolism	ko00270	41	326	0.126	0.0540536	0.22842
Pantothenate and CoA biosynthesis	Metabolism	Metabolism of cofactors and vitamins	ko00770	13	88	0.148	0.0844637	0.340338
Fatty acid biosynthesis	Metabolism	Lipid metabolism	ko00061	18	131	0.137	0.0857339	0.340338
MAPK signaling pathway - plant	Environmental Information Processing	Signal transduction	ko04016	79	698	0.113	0.0887394	0.341908
Peroxisome	Cellular Processes	Transport and catabolism	ko04146	31	250	0.124	0.0972006	0.357935
Sphingolipid metabolism	Metabolism	Lipid metabolism	ko00600	21	160	0.131	0.0983637	0.357935
Glutathione metabolism	Metabolism	Metabolism of other amino acids	ko00480	25	198	0.126	0.108116	0.38279
Taurine and hypotaurine metabolism	Metabolism	Metabolism of other amino acids	ko00430	4	20	0.2	0.124103	0.427827
Valine, leucine and isoleucine biosynthesis	Metabolism	Amino acid metabolism	ko00290	8	52	0.154	0.129752	0.435834
Glycosphingolipid biosynthesis - lacto and neolacto series	Metabolism	Glycan biosynthesis and metabolism	ko00601	2	7	0.286	0.143579	0.46401
Starch and sucrose metabolism	Metabolism	Carbohydrate metabolism	ko00500	62	556	0.112	0.145224	0.46401
Glycerolipid metabolism	Metabolism	Lipid metabolism	ko00561	28	235	0.119	0.155017	0.483505
Isoflavonoid biosynthesis	Metabolism	Biosynthesis of other secondary metabolites	ko00943	5	30	0.167	0.162885	0.496231
Isoquinoline alkaloid biosynthesis	Metabolism	Biosynthesis of other secondary metabolites	ko00950	9	65	0.138	0.179296	0.517247
Pentose phosphate pathway	Metabolism	Carbohydrate metabolism	ko00030	17	137	0.124	0.179901	0.517247
Glycosaminoglycan degradation	Metabolism	Glycan biosynthesis and metabolism	ko00531	10	74	0.135	0.181629	0.517247
Glycosphingolipid biosynthesis - ganglio series	Metabolism	Glycan biosynthesis and metabolism	ko00604	8	58	0.138	0.20077	0.559593
Other glycan degradation	Metabolism	Glycan biosynthesis and metabolism	ko00511	15	122	0.123	0.208283	0.560391
Valine, leucine and isoleucine degradation	Metabolism	Amino acid metabolism	ko00280	18	150	0.12	0.209612	0.560391
Glucosinolate biosynthesis	Metabolism	Biosynthesis of other secondary metabolites	ko00966	4	25	0.16	0.222755	0.574306
Glycine, serine and threonine metabolism	Metabolism	Amino acid metabolism	ko00260	19	162	0.117	0.230913	0.574306
2-Oxocarboxylic acid metabolism	Metabolism	Global and overview maps	ko01210	18	153	0.118	0.23449	0.574306
Nitrogen metabolism	Metabolism	Energy metabolism	ko00910	12	97	0.124	0.234623	0.574306
Tropane, piperidine and pyridine alkaloid biosynthesis	Metabolism	Biosynthesis of other secondary metabolites	ko00960	9	70	0.129	0.240382	0.574306
Butanoate metabolism	Metabolism	Carbohydrate metabolism	ko00650	8	61	0.131	0.241121	0.574306
Inositol phosphate metabolism	Metabolism	Carbohydrate metabolism	ko00562	23	202	0.114	0.246566	0.576789
Steroid biosynthesis	Metabolism	Lipid metabolism	ko00100	9	71	0.127	0.253404	0.582385
Tyrosine metabolism	Metabolism	Amino acid metabolism	ko00350	13	111	0.117	0.2852	0.644159
Ascorbate and aldarate metabolism	Metabolism	Carbohydrate metabolism	ko00053	19	169	0.112	0.291024	0.646171
Phenylalanine metabolism	Metabolism	Amino acid metabolism	ko00360	11	96	0.115	0.333336	0.723093
Aflatoxin biosynthesis	Metabolism	Biosynthesis of other secondary metabolites	ko00254	1	4	0.25	0.336707	0.723093
Benzoxazinoid biosynthesis	Metabolism	Biosynthesis of other secondary metabolites	ko00402	3	22	0.136	0.364561	0.770282
Fatty acid elongation	Metabolism	Lipid metabolism	ko00062	9	80	0.113	0.378253	0.786525
Arginine biosynthesis	Metabolism	Amino acid metabolism	ko00220	9	81	0.111	0.392599	0.803601
Phosphonate and phosphinate metabolism	Metabolism	Metabolism of other amino acids	ko00440	2	14	0.143	0.402689	0.811574
Fatty acid metabolism	Metabolism	Global and overview maps	ko01212	22	214	0.103	0.430435	0.854348
Vitamin B6 metabolism	Metabolism	Metabolism of cofactors and vitamins	ko00750	5	45	0.111	0.45057	0.859151
Thiamine metabolism	Metabolism	Metabolism of cofactors and vitamins	ko00730	6	55	0.109	0.450968	0.859151
Glycerophospholipid metabolism	Metabolism	Lipid metabolism	ko00564	26	257	0.101	0.45253	0.859151
beta-Alanine metabolism	Metabolism	Metabolism of other amino acids	ko00410	12	116	0.103	0.460121	0.859567
Biotin metabolism	Metabolism	Metabolism of cofactors and vitamins	ko00780	6	56	0.107	0.468699	0.859567
C5-Branched dibasic acid metabolism	Metabolism	Carbohydrate metabolism	ko00660	3	26	0.115	0.472434	0.859567
Lysine biosynthesis	Metabolism	Amino acid metabolism	ko00300	4	38	0.105	0.514891	0.923982
Pentose and glucuronate interconversions	Metabolism	Carbohydrate metabolism	ko00040	33	341	0.097	0.546455	0.959293
Arginine and proline metabolism	Metabolism	Amino acid metabolism	ko00330	12	124	0.097	0.55604	0.959293
Monobactam biosynthesis	Metabolism	Biosynthesis of other secondary metabolites	ko00261	4	40	0.1	0.556536	0.959293
Folate biosynthesis	Metabolism	Metabolism of cofactors and vitamins	ko00790	7	75	0.093	0.606172	1
Pyruvate metabolism	Metabolism	Carbohydrate metabolism	ko00620	21	225	0.093	0.618022	1
Flavone and flavonol biosynthesis	Metabolism	Biosynthesis of other secondary metabolites	ko00944	2	21	0.095	0.621268	1
Phosphatidylinositol signaling system	Environmental Information Processing	Signal transduction	ko04070	20	215	0.093	0.622861	1
Amino sugar and nucleotide sugar metabolism	Metabolism	Carbohydrate metabolism	ko00520	34	363	0.094	0.625711	1
Tryptophan metabolism	Metabolism	Amino acid metabolism	ko00380	11	122	0.09	0.653388	1
Biosynthesis of amino acids	Metabolism	Global and overview maps	ko01230	58	623	0.093	0.668662	1
Sulfur relay system	Genetic Information Processing	Folding, sorting and degradation	ko04122	2	24	0.083	0.694106	1
Phenylalanine, tyrosine and tryptophan biosynthesis	Metabolism	Amino acid metabolism	ko00400	10	116	0.086	0.705653	1
Fructose and mannose metabolism	Metabolism	Carbohydrate metabolism	ko00051	14	162	0.086	0.722406	1
Ether lipid metabolism	Metabolism	Lipid metabolism	ko00565	8	96	0.083	0.730749	1
Linoleic acid metabolism	Metabolism	Lipid metabolism	ko00591	3	39	0.077	0.746919	1
Lipoic acid metabolism	Metabolism	Metabolism of cofactors and vitamins	ko00785	1	14	0.071	0.762451	1
Aminoacyl-tRNA biosynthesis	Genetic Information Processing	Translation	ko00970	18	212	0.085	0.766329	1
Glycolysis / Gluconeogenesis	Metabolism	Carbohydrate metabolism	ko00010	26	301	0.086	0.772202	1
One carbon pool by folate	Metabolism	Metabolism of cofactors and vitamins	ko00670	3	42	0.071	0.790929	1
Pyrimidine metabolism	Metabolism	Nucleotide metabolism	ko00240	16	194	0.082	0.794992	1
Other types of O-glycan biosynthesis	Metabolism	Glycan biosynthesis and metabolism	ko00514	4	55	0.073	0.797422	1
Cutin, suberine and wax biosynthesis	Metabolism	Lipid metabolism	ko00073	7	92	0.076	0.805491	1
alpha-Linolenic acid metabolism	Metabolism	Lipid metabolism	ko00592	12	156	0.077	0.843812	1
Biosynthesis of unsaturated fatty acids	Metabolism	Lipid metabolism	ko01040	5	73	0.068	0.85193	1
Limonene and pinene degradation	Metabolism	Metabolism of terpenoids and polyketides	ko00903	1	19	0.053	0.857877	1
Fatty acid degradation	Metabolism	Lipid metabolism	ko00071	12	159	0.075	0.861109	1
Citrate cycle (TCA cycle)	Metabolism	Carbohydrate metabolism	ko00020	11	148	0.074	0.86566	1
Sulfur metabolism	Metabolism	Energy metabolism	ko00920	6	91	0.066	0.889693	1
Synthesis and degradation of ketone bodies	Metabolism	Lipid metabolism	ko00072	1	23	0.043	0.905782	1
Various types of N-glycan biosynthesis	Metabolism	Glycan biosynthesis and metabolism	ko00513	5	86	0.058	0.931215	1
Lysine degradation	Metabolism	Amino acid metabolism	ko00310	8	128	0.062	0.939947	1
Propanoate metabolism	Metabolism	Carbohydrate metabolism	ko00640	8	129	0.062	0.943064	1
Histidine metabolism	Metabolism	Amino acid metabolism	ko00340	2	46	0.043	0.947045	1
Proteasome	Genetic Information Processing	Folding, sorting and degradation	ko03050	14	207	0.068	0.948913	1
N-Glycan biosynthesis	Metabolism	Glycan biosynthesis and metabolism	ko00510	7	118	0.059	0.949377	1
Phagosome	Cellular Processes	Transport and catabolism	ko04145	16	237	0.068	0.959449	1
Glycosylphosphatidylinositol(GPI)-anchor biosynthesis	Metabolism	Glycan biosynthesis and metabolism	ko00563	3	68	0.044	0.967697	1
Selenocompound metabolism	Metabolism	Metabolism of other amino acids	ko00450	5	98	0.051	0.968151	1
Protein export	Genetic Information Processing	Folding, sorting and degradation	ko03060	6	133	0.045	0.991887	1
Purine metabolism	Metabolism	Nucleotide metabolism	ko00230	17	292	0.058	0.994435	1
RNA degradation	Genetic Information Processing	Folding, sorting and degradation	ko03018	22	365	0.06	0.996198	1
Ubiquitin mediated proteolysis	Genetic Information Processing	Folding, sorting and degradation	ko04120	22	366	0.06	0.996375	1
SNARE interactions in vesicular transport	Genetic Information Processing	Folding, sorting and degradation	ko04130	3	96	0.031	0.996666	1
Base excision repair	Genetic Information Processing	Replication and repair	ko03410	5	130	0.038	0.996699	1
Basal transcription factors	Genetic Information Processing	Transcription	ko03022	4	117	0.034	0.997498	1
RNA polymerase	Genetic Information Processing	Transcription	ko03020	11	226	0.049	0.997734	1
Nucleotide excision repair	Genetic Information Processing	Replication and repair	ko03420	8	220	0.036	0.999843	1
mRNA surveillance pathway	Genetic Information Processing	Translation	ko03015	23	442	0.052	0.999857	1
Oxidative phosphorylation	Metabolism	Energy metabolism	ko00190	18	377	0.048	0.999893	1
Homologous recombination	Genetic Information Processing	Replication and repair	ko03440	6	202	0.03	0.999954	1
Endocytosis	Cellular Processes	Transport and catabolism	ko04144	25	492	0.051	0.999959	1
Mismatch repair	Genetic Information Processing	Replication and repair	ko03430	4	167	0.024	0.999961	1
Protein processing in endoplasmic reticulum	Genetic Information Processing	Folding, sorting and degradation	ko04141	33	627	0.053	0.99999	1
DNA replication	Genetic Information Processing	Replication and repair	ko03030	4	193	0.021	0.999996	1
Ribosome biogenesis in eukaryotes	Genetic Information Processing	Translation	ko03008	6	247	0.024	0.999999	1
RNA transport	Genetic Information Processing	Translation	ko03013	26	603	0.043	1	1
Ribosome	Genetic Information Processing	Translation	ko03010	30	829	0.036	1	1
Spliceosome	Genetic Information Processing	Transcription	ko03040	21	597	0.035	1	1

## Sheet: C
GO analysis for up regulatedand down Xylem-Specifically Expressed Genes (X-SEGs) of F. mandshurica × F. sogdiana (1601)
Ontoloty	GO term	GO ID (level1)	GO ID (level2)	Number of Genes	Pvalue	Qvalue
Biological Process	multi-organism process	GO:0008150	GO:0051704	54	2.61514e-10	7.78439e-08
Biological Process	single-organism process	GO:0008150	GO:0044699	965	9.64236e-07	8.2006e-05
Biological Process	immune system process	GO:0008150	GO:0002376	16	0.000393888	0.0103328
Biological Process	reproduction	GO:0008150	GO:0000003	51	0.0026906	0.0457153
Biological Process	reproductive process	GO:0008150	GO:0022414	51	0.0026906	0.0457153
Biological Process	response to stimulus	GO:0008150	GO:0050896	248	0.00449606	0.0618938
Biological Process	rhythmic process	GO:0008150	GO:0048511	8	0.0290567	0.208415
Biological Process	biological regulation	GO:0008150	GO:0065007	362	0.0310659	0.220174
Biological Process	multicellular organismal process	GO:0008150	GO:0032501	69	0.0372531	0.241942
Biological Process	signaling	GO:0008150	GO:0023052	89	0.0418067	0.264776
Biological Process	locomotion	GO:0008150	GO:0040011	3	0.112411	0.510855
Biological Process	positive regulation of biological process	GO:0008150	GO:0048518	45	0.136085	0.564668
Biological Process	regulation of biological process	GO:0008150	GO:0050789	322	0.154905	0.610728
Biological Process	developmental process	GO:0008150	GO:0032502	65	0.299276	0.80986
Biological Process	biological adhesion	GO:0008150	GO:0022610	1	0.443056	0.924398
Biological Process	growth	GO:0008150	GO:0040007	7	0.461771	0.937185
Biological Process	metabolic process	GO:0008150	GO:0008152	1082	0.481771	0.956048
Biological Process	localization	GO:0008150	GO:0051179	210	0.994666	1
Biological Process	negative regulation of biological process	GO:0008150	GO:0048519	29	0.994851	1
Biological Process	cellular process	GO:0008150	GO:0009987	1179	0.999955	1
Biological Process	cellular component organization or biogenesis	GO:0008150	GO:0071840	181	0.999991	1
Molecular Function	nucleic acid binding transcription factor activity	GO:0003674	GO:0001071	181	3.28672e-05	0.00412097
Molecular Function	transporter activity	GO:0003674	GO:0005215	289	0.000169413	0.0102183
Molecular Function	catalytic activity	GO:0003674	GO:0003824	2103	0.000225292	0.0122945
Molecular Function	nutrient reservoir activity	GO:0003674	GO:0045735	12	0.043219	0.334655
Molecular Function	signal transducer activity	GO:0003674	GO:0004871	31	0.118663	0.541785
Molecular Function	molecular transducer activity	GO:0003674	GO:0060089	21	0.375525	0.824714
Molecular Function	transcription factor activity, protein binding	GO:0003674	GO:0000988	15	0.49054	0.881128
Molecular Function	antioxidant activity	GO:0003674	GO:0016209	33	0.558846	0.944288
Molecular Function	electron carrier activity	GO:0003674	GO:0009055	34	0.809634	1
Molecular Function	binding	GO:0003674	GO:0005488	1971	0.950401	1
Molecular Function	molecular function regulator	GO:0003674	GO:0098772	40	0.998372	1
Molecular Function	structural molecule activity	GO:0003674	GO:0005198	37	1	1
Cellular Component	membrane part	GO:0005575	GO:0044425	1559	6.61881e-27	4.94756e-25
Cellular Component	membrane	GO:0005575	GO:0016020	1606	2.45108e-24	1.04696e-22
Cellular Component	extracellular region	GO:0005575	GO:0005576	90	0.0584893	0.564139
Cellular Component	supramolecular fiber	GO:0005575	GO:0099512	22	0.414565	1
Cellular Component	extracellular matrix	GO:0005575	GO:0031012	3	0.449027	1
Cellular Component	nucleoid	GO:0005575	GO:0009295	1	0.483591	1
Cellular Component	extracellular region part	GO:0005575	GO:0044421	3	0.897443	1
Cellular Component	cell junction	GO:0005575	GO:0030054	5	0.961841	1
Cellular Component	symplast	GO:0005575	GO:0055044	5	0.961841	1
Cellular Component	virion	GO:0005575	GO:0019012	3	0.999957	1
Cellular Component	virion part	GO:0005575	GO:0044423	3	0.999957	1
Cellular Component	membrane-enclosed lumen	GO:0005575	GO:0031974	17	1	1
Cellular Component	cell	GO:0005575	GO:0005623	1044	1	1
Cellular Component	cell part	GO:0005575	GO:0044464	993	1	1
Cellular Component	organelle	GO:0005575	GO:0043226	777	1	1
Cellular Component	macromolecular complex	GO:0005575	GO:0032991	199	1	1
Cellular Component	organelle part	GO:0005575	GO:0044422	233	1	1

## Sheet: D
KEGG analysis for up and down regulated Xylem-Specifically Expressed Genes (X-SEGs) of F. mandshurica × F. sogdiana (1601)
Pathway	KEGG_A_class	KEGG_B_class	Pathway ID	X (2149)	All (15369)	Rich factor	Pvalue	Qvalue
Photosynthesis	Metabolism	Energy metabolism	ko00195	64	154	0.416	3.49e-17	3.8e-15
Photosynthesis - antenna proteins	Metabolism	Energy metabolism	ko00196	27	35	0.771	5.55e-17	3.8e-15
Metabolic pathways	Metabolism	Global and overview maps	ko01100	1067	6400	0.167	4.09e-16	1.87e-14
Biosynthesis of secondary metabolites	Metabolism	Global and overview maps	ko01110	613	3374	0.182	6.49e-15	2.22e-13
Galactose metabolism	Metabolism	Carbohydrate metabolism	ko00052	78	258	0.302	9.3e-12	2.55e-10
Plant-pathogen interaction	Organismal Systems	Environmental adaptation	ko04626	197	1028	0.192	1.18e-06	2.7e-05
Phenylpropanoid biosynthesis	Metabolism	Biosynthesis of other secondary metabolites	ko00940	99	456	0.217	3.54e-06	6.93e-05
Carotenoid biosynthesis	Metabolism	Metabolism of terpenoids and polyketides	ko00906	36	125	0.288	1.19e-05	0.000204
Flavonoid biosynthesis	Metabolism	Biosynthesis of other secondary metabolites	ko00941	37	133	0.278	2.13e-05	0.000324
Carbon fixation in photosynthetic organisms	Metabolism	Energy metabolism	ko00710	44	179	0.246	0.000101401	0.00139
ABC transporters	Environmental Information Processing	Membrane transport	ko02010	52	224	0.232	0.000124275	0.00155
Porphyrin and chlorophyll metabolism	Metabolism	Metabolism of cofactors and vitamins	ko00860	33	130	0.254	0.000382141	0.00436
Betalain biosynthesis	Metabolism	Biosynthesis of other secondary metabolites	ko00965	16	48	0.333	0.000539559	0.00565
Plant hormone signal transduction	Environmental Information Processing	Signal transduction	ko04075	174	991	0.176	0.000641276	0.00565
Cyanoamino acid metabolism	Metabolism	Metabolism of other amino acids	ko00460	46	205	0.224	0.000655441	0.00565
Starch and sucrose metabolism	Metabolism	Carbohydrate metabolism	ko00500	105	556	0.189	0.000659981	0.00565
Phosphatidylinositol signaling system	Environmental Information Processing	Signal transduction	ko04070	46	215	0.214	0.00186041	0.015
MAPK signaling pathway - plant	Environmental Information Processing	Signal transduction	ko04016	124	698	0.178	0.00245141	0.0187
Stilbenoid, diarylheptanoid and gingerol biosynthesis	Metabolism	Biosynthesis of other secondary metabolites	ko00945	17	60	0.283	0.00278228	0.0201
Ubiquinone and other terpenoid-quinone biosynthesis	Metabolism	Metabolism of cofactors and vitamins	ko00130	22	91	0.242	0.00630006	0.0427
Nitrogen metabolism	Metabolism	Energy metabolism	ko00910	23	97	0.237	0.00679689	0.0427
Glyoxylate and dicarboxylate metabolism	Metabolism	Carbohydrate metabolism	ko00630	40	194	0.206	0.00685814	0.0427
Other glycan degradation	Metabolism	Glycan biosynthesis and metabolism	ko00511	27	122	0.221	0.00941669	0.0561
Glycosphingolipid biosynthesis - ganglio series	Metabolism	Glycan biosynthesis and metabolism	ko00604	15	58	0.259	0.0118046	0.0674
Taurine and hypotaurine metabolism	Metabolism	Metabolism of other amino acids	ko00430	7	20	0.35	0.0151823	0.0809
Valine, leucine and isoleucine degradation	Metabolism	Amino acid metabolism	ko00280	31	150	0.207	0.015357	0.0809
Zeatin biosynthesis	Metabolism	Metabolism of terpenoids and polyketides	ko00908	20	89	0.225	0.0197848	0.0983
Amino sugar and nucleotide sugar metabolism	Metabolism	Carbohydrate metabolism	ko00520	65	363	0.179	0.0200864	0.0983
Glycosaminoglycan degradation	Metabolism	Glycan biosynthesis and metabolism	ko00531	17	74	0.23	0.0246107	0.116
Ascorbate and aldarate metabolism	Metabolism	Carbohydrate metabolism	ko00053	33	169	0.195	0.027798	0.127
Isoquinoline alkaloid biosynthesis	Metabolism	Biosynthesis of other secondary metabolites	ko00950	15	65	0.231	0.0321997	0.142
Inositol phosphate metabolism	Metabolism	Carbohydrate metabolism	ko00562	38	202	0.188	0.0330529	0.142
Sphingolipid metabolism	Metabolism	Lipid metabolism	ko00600	31	160	0.194	0.0354038	0.147
Sesquiterpenoid and triterpenoid biosynthesis	Metabolism	Metabolism of terpenoids and polyketides	ko00909	20	95	0.211	0.0377773	0.152
Cysteine and methionine metabolism	Metabolism	Amino acid metabolism	ko00270	57	326	0.175	0.0420309	0.165
Tyrosine metabolism	Metabolism	Amino acid metabolism	ko00350	22	111	0.198	0.0551037	0.206
Anthocyanin biosynthesis	Metabolism	Biosynthesis of other secondary metabolites	ko00942	4	11	0.364	0.0557199	0.206
Glycosphingolipid biosynthesis - globo and isoglobo series	Metabolism	Glycan biosynthesis and metabolism	ko00603	7	26	0.269	0.061005	0.22
Carbon metabolism	Metabolism	Global and overview maps	ko01200	104	647	0.161	0.0675271	0.237
Phenylalanine metabolism	Metabolism	Amino acid metabolism	ko00360	19	96	0.198	0.0716557	0.245
Fructose and mannose metabolism	Metabolism	Carbohydrate metabolism	ko00051	29	162	0.179	0.0943254	0.314
Indole alkaloid biosynthesis	Metabolism	Biosynthesis of other secondary metabolites	ko00901	4	13	0.308	0.0962818	0.314
Terpenoid backbone biosynthesis	Metabolism	Metabolism of terpenoids and polyketides	ko00900	25	138	0.181	0.102438	0.326
Glycine, serine and threonine metabolism	Metabolism	Amino acid metabolism	ko00260	28	162	0.173	0.135684	0.422
Circadian rhythm - plant	Organismal Systems	Environmental adaptation	ko04712	42	257	0.163	0.156338	0.476
Benzoxazinoid biosynthesis	Metabolism	Biosynthesis of other secondary metabolites	ko00402	5	22	0.227	0.184787	0.55
Pentose phosphate pathway	Metabolism	Carbohydrate metabolism	ko00030	23	137	0.168	0.201278	0.578
Arginine and proline metabolism	Metabolism	Amino acid metabolism	ko00330	21	124	0.169	0.202594	0.578
Cutin, suberine and wax biosynthesis	Metabolism	Lipid metabolism	ko00073	16	92	0.174	0.209403	0.585
Butanoate metabolism	Metabolism	Carbohydrate metabolism	ko00650	11	61	0.18	0.226618	0.621
Glycosphingolipid biosynthesis - lacto and neolacto series	Metabolism	Glycan biosynthesis and metabolism	ko00601	2	7	0.286	0.255103	0.672
Riboflavin metabolism	Metabolism	Metabolism of cofactors and vitamins	ko00740	11	63	0.175	0.260308	0.672
Phenylalanine, tyrosine and tryptophan biosynthesis	Metabolism	Amino acid metabolism	ko00400	19	116	0.164	0.263533	0.672
Glucosinolate biosynthesis	Metabolism	Biosynthesis of other secondary metabolites	ko00966	5	25	0.2	0.265786	0.672
Limonene and pinene degradation	Metabolism	Metabolism of terpenoids and polyketides	ko00903	4	19	0.211	0.269958	0.672
Vitamin B6 metabolism	Metabolism	Metabolism of cofactors and vitamins	ko00750	8	45	0.178	0.288717	0.706
Pentose and glucuronate interconversions	Metabolism	Carbohydrate metabolism	ko00040	51	341	0.15	0.322916	0.766
Fatty acid elongation	Metabolism	Lipid metabolism	ko00062	13	80	0.163	0.324251	0.766
Glutathione metabolism	Metabolism	Metabolism of other amino acids	ko00480	30	198	0.152	0.346505	0.794
Alanine, aspartate and glutamate metabolism	Metabolism	Amino acid metabolism	ko00250	15	95	0.158	0.347775	0.794
Biosynthesis of amino acids	Metabolism	Global and overview maps	ko01230	90	623	0.144	0.384555	0.864
Monoterpenoid biosynthesis	Metabolism	Metabolism of terpenoids and polyketides	ko00902	3	16	0.188	0.391765	0.866
Glycolysis / Gluconeogenesis	Metabolism	Carbohydrate metabolism	ko00010	44	301	0.146	0.399278	0.867
Arachidonic acid metabolism	Metabolism	Lipid metabolism	ko00590	12	78	0.154	0.408396	0.867
Nicotinate and nicotinamide metabolism	Metabolism	Metabolism of cofactors and vitamins	ko00760	15	99	0.152	0.411299	0.867
Tryptophan metabolism	Metabolism	Amino acid metabolism	ko00380	18	122	0.148	0.441875	0.917
Aflatoxin biosynthesis	Metabolism	Biosynthesis of other secondary metabolites	ko00254	1	4	0.25	0.452586	0.925
Pantothenate and CoA biosynthesis	Metabolism	Metabolism of cofactors and vitamins	ko00770	13	88	0.148	0.461409	0.93
Linoleic acid metabolism	Metabolism	Lipid metabolism	ko00591	6	39	0.154	0.468915	0.931
Caffeine metabolism	Metabolism	Biosynthesis of other secondary metabolites	ko00232	1	5	0.2	0.529149	1
Mannose type O-glycan biosyntheis	Metabolism	Glycan biosynthesis and metabolism	ko00515	1	5	0.2	0.529149	1
Diterpenoid biosynthesis	Metabolism	Metabolism of terpenoids and polyketides	ko00904	13	93	0.14	0.54604	1
beta-Alanine metabolism	Metabolism	Metabolism of other amino acids	ko00410	16	116	0.138	0.564459	1
Pyruvate metabolism	Metabolism	Carbohydrate metabolism	ko00620	31	225	0.138	0.56516	1
Flavone and flavonol biosynthesis	Metabolism	Biosynthesis of other secondary metabolites	ko00944	3	21	0.143	0.578741	1
Biosynthesis of various secondary metabolites - part 2	Metabolism	Biosynthesis of other secondary metabolites	ko00998	1	6	0.167	0.595008	1
Peroxisome	Cellular Processes	Transport and catabolism	ko04146	34	250	0.136	0.597833	1
Phosphonate and phosphinate metabolism	Metabolism	Metabolism of other amino acids	ko00440	2	14	0.143	0.602445	1
Valine, leucine and isoleucine biosynthesis	Metabolism	Amino acid metabolism	ko00290	7	52	0.135	0.603947	1
Histidine metabolism	Metabolism	Amino acid metabolism	ko00340	6	46	0.13	0.637379	1
Synthesis and degradation of ketone bodies	Metabolism	Lipid metabolism	ko00072	3	23	0.13	0.642657	1
Tropane, piperidine and pyridine alkaloid biosynthesis	Metabolism	Biosynthesis of other secondary metabolites	ko00960	9	70	0.129	0.65924	1
Thiamine metabolism	Metabolism	Metabolism of cofactors and vitamins	ko00730	7	55	0.127	0.664649	1
Monobactam biosynthesis	Metabolism	Biosynthesis of other secondary metabolites	ko00261	5	40	0.125	0.675422	1
Pyrimidine metabolism	Metabolism	Nucleotide metabolism	ko00240	25	194	0.129	0.701843	1
Selenocompound metabolism	Metabolism	Metabolism of other amino acids	ko00450	12	98	0.122	0.733272	1
Glycerolipid metabolism	Metabolism	Lipid metabolism	ko00561	30	235	0.128	0.733491	1
2-Oxocarboxylic acid metabolism	Metabolism	Global and overview maps	ko01210	19	153	0.124	0.746229	1
Citrate cycle (TCA cycle)	Metabolism	Carbohydrate metabolism	ko00020	18	148	0.122	0.773034	1
Steroid biosynthesis	Metabolism	Lipid metabolism	ko00100	8	71	0.113	0.793986	1
Lysine biosynthesis	Metabolism	Amino acid metabolism	ko00300	4	38	0.105	0.797765	1
RNA polymerase	Genetic Information Processing	Transcription	ko03020	27	226	0.119	0.837854	1
Folate biosynthesis	Metabolism	Metabolism of cofactors and vitamins	ko00790	8	75	0.107	0.84107	1
Glycosylphosphatidylinositol(GPI)-anchor biosynthesis	Metabolism	Glycan biosynthesis and metabolism	ko00563	7	68	0.103	0.855941	1
One carbon pool by folate	Metabolism	Metabolism of cofactors and vitamins	ko00670	4	42	0.095	0.857432	1
Ether lipid metabolism	Metabolism	Lipid metabolism	ko00565	10	96	0.104	0.879843	1
alpha-Linolenic acid metabolism	Metabolism	Lipid metabolism	ko00592	17	156	0.109	0.894394	1
Arginine biosynthesis	Metabolism	Amino acid metabolism	ko00220	8	81	0.099	0.895244	1
C5-Branched dibasic acid metabolism	Metabolism	Carbohydrate metabolism	ko00660	2	26	0.077	0.896101	1
Other types of O-glycan biosynthesis	Metabolism	Glycan biosynthesis and metabolism	ko00514	5	55	0.091	0.899416	1
Biotin metabolism	Metabolism	Metabolism of cofactors and vitamins	ko00780	5	56	0.089	0.907816	1
Fatty acid degradation	Metabolism	Lipid metabolism	ko00071	17	159	0.107	0.91017	1
Glycerophospholipid metabolism	Metabolism	Lipid metabolism	ko00564	29	257	0.113	0.914453	1
Base excision repair	Genetic Information Processing	Replication and repair	ko03410	13	130	0.1	0.930816	1
Isoflavonoid biosynthesis	Metabolism	Biosynthesis of other secondary metabolites	ko00943	2	30	0.067	0.9361	1
Protein export	Genetic Information Processing	Folding, sorting and degradation	ko03060	13	133	0.098	0.942982	1
Sulfur metabolism	Metabolism	Energy metabolism	ko00920	8	91	0.088	0.951007	1
Phagosome	Cellular Processes	Transport and catabolism	ko04145	25	237	0.105	0.95288	1
Sulfur relay system	Genetic Information Processing	Folding, sorting and degradation	ko04122	1	24	0.042	0.973159	1
RNA degradation	Genetic Information Processing	Folding, sorting and degradation	ko03018	39	365	0.107	0.975498	1
Brassinosteroid biosynthesis	Metabolism	Metabolism of terpenoids and polyketides	ko00905	2	38	0.053	0.976664	1
Purine metabolism	Metabolism	Nucleotide metabolism	ko00230	30	292	0.103	0.976869	1
Fatty acid biosynthesis	Metabolism	Lipid metabolism	ko00061	11	131	0.084	0.981698	1
Ubiquitin mediated proteolysis	Genetic Information Processing	Folding, sorting and degradation	ko04120	38	366	0.104	0.984387	1
SNARE interactions in vesicular transport	Genetic Information Processing	Folding, sorting and degradation	ko04130	7	96	0.073	0.985985	1
Various types of N-glycan biosynthesis	Metabolism	Glycan biosynthesis and metabolism	ko00513	6	86	0.07	0.98602	1
Proteasome	Genetic Information Processing	Folding, sorting and degradation	ko03050	19	207	0.092	0.986349	1
Lysine degradation	Metabolism	Amino acid metabolism	ko00310	10	128	0.078	0.989106	1
Aminoacyl-tRNA biosynthesis	Genetic Information Processing	Translation	ko00970	19	212	0.09	0.990248	1
Biosynthesis of unsaturated fatty acids	Metabolism	Lipid metabolism	ko01040	4	73	0.055	0.99422	1
Oxidative phosphorylation	Metabolism	Energy metabolism	ko00190	36	377	0.095	0.996588	1
Homologous recombination	Genetic Information Processing	Replication and repair	ko03440	16	202	0.079	0.997294	1
Mismatch repair	Genetic Information Processing	Replication and repair	ko03430	12	167	0.072	0.997975	1
Propanoate metabolism	Metabolism	Carbohydrate metabolism	ko00640	8	129	0.062	0.998431	1
Fatty acid metabolism	Metabolism	Global and overview maps	ko01212	16	214	0.075	0.998975	1
N-Glycan biosynthesis	Metabolism	Glycan biosynthesis and metabolism	ko00510	6	118	0.051	0.999511	1
mRNA surveillance pathway	Genetic Information Processing	Translation	ko03015	39	442	0.088	0.999695	1
Nucleotide excision repair	Genetic Information Processing	Replication and repair	ko03420	14	220	0.064	0.999897	1
DNA replication	Genetic Information Processing	Replication and repair	ko03030	11	193	0.057	0.999935	1
Endocytosis	Cellular Processes	Transport and catabolism	ko04144	41	492	0.083	0.999965	1
Autophagy - other eukaryotes	Cellular Processes	Transport and catabolism	ko04136	2	94	0.021	0.999989	1
RNA transport	Genetic Information Processing	Translation	ko03013	51	603	0.085	0.999992	1
Basal transcription factors	Genetic Information Processing	Transcription	ko03022	3	117	0.026	0.999996	1
Ribosome biogenesis in eukaryotes	Genetic Information Processing	Translation	ko03008	11	247	0.045	1	1
Ribosome	Genetic Information Processing	Translation	ko03010	32	829	0.039	1	1
Spliceosome	Genetic Information Processing	Transcription	ko03040	37	597	0.062	1	1
Protein processing in endoplasmic reticulum	Genetic Information Processing	Folding, sorting and degradation	ko04141	44	627	0.07	1	1
